# Supplementary material for: MediaWise cloud content orchestrator
Source: Springer Nature journal article supplement (doi:10.1186/1869-0238-4-2), 2013-01-30

## Widget Layer–Front End

Media Appliance  
Widget

Instance  
Widget

Storage  
Widget

Content  
Widget

Monitor  
Widget

Security  
Widget

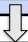

## Programming Layer–Back End

Media Appliance  
Manager

Instance  
Manager

Storage  
Manager

Content Manager

Monitor  
Manager

Security  
Manager

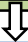

SOAP/Restful API

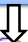

Infrastructure Layer  
harnessing public clouds

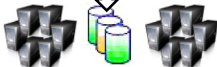

Supplement: 13174_2012_2_MOESM2_ESM.pdf [file 13174_2012_2_MOESM2_ESM.pdf]
